1 **Revisiting the phylogeny of Zoanthidea (Cnidaria: Anthozoa): staggered alignment of**  
2 **hypervariable sequences improves species tree inference**

3

4 Timothy D. Swain

5 Integrative Research Center, Field Museum of Natural History, Chicago, IL 60605, USA

6 Department of Civil and Environmental Engineering, Northwestern University, Evanston, IL

7 60208, USA

8 Email: [tswain@fieldmuseum.org](mailto:tswain@fieldmuseum.org)

9 Phone: 312-665-7756

10 Fax: 312-665-7516

11

12 **Abstract**

13 The recent rapid proliferation of novel taxon identification in the Zoanthidea has been  
14 accompanied by a parallel propagation of gene trees as a tool of species discovery, but not a  
15 corresponding increase in our understanding of phylogeny. This disparity is caused by the trade-  
16 off between the capabilities of automated DNA sequence alignment and data content of genes  
17 applied to phylogenetic inference in this group. Conserved genes or segments are easily aligned  
18 across the order, but produce poorly resolved trees; hypervariable genes or segments contain the  
19 evolutionary signal necessary for resolution and robust support, but sequence alignment is  
20 daunting. Staggered alignments are a form of phylogeny-informed sequence alignment  
21 composed of a mosaic of local and universal regions that allow phylogenetic inference to be  
22 applied to all nucleotides from both hypervariable and conserved gene segments. Comparisons  
23 between species tree phylogenies inferred from all data (staggered alignment) and hypervariable-

24 excluded data (standard alignment) demonstrate improved confidence and greater topological  
25 agreement with other sources of data for the complete-data tree. This novel phylogeny is the  
26 most comprehensive to date (in terms of taxa and data) and can serve as an expandable tool for  
27 evolutionary hypothesis testing in the Zoanthidea.

28

## 29 **Resumen**

30 Spanish language translation by Lisbeth O. Swain, DePaul University, Chicago, Illinois, 60604,  
31 USA.

32 Aunque la proliferación reciente y acelerada en la identificación de taxones en  
33 Zoanthidea ha sido acompañada por una propagación paralela de los árboles de genes como una  
34 herramienta en el descubrimiento de especies, no hay una correspondencia en cuanto a la  
35 ampliación de nuestro conocimiento en filogenia. Esta disparidad, es causada por la competencia  
36 entre la capacidad de los alineamientos de secuencia del ácido desoxirribonucleico (ADN)  
37 automatizados y la información contenida en los datos de genes que se aplican a los métodos de  
38 inferencia filogenética en este grupo de Zoanthidea. Las regiones o segmentos de genes  
39 conservados son fácilmente alineados dentro del orden; sin embargo, producen árboles de genes  
40 con resultados paupérrimos; además, aunque estas regiones hipervariables de genes o segmentos  
41 contienen las señas evolutivas necesarias para apoyar la construcción robusta y completa de  
42 árboles filogenéticos, estos genes producen alineamientos de secuencia abrumadores. Los  
43 alineamientos escalonados de secuencias son una forma de alineamientos informados por la  
44 filogenia y compuestos de un mosaico de regiones locales y universales que permiten que  
45 inferencias filogenéticas sean aplicadas a todos los nucleótidos de regiones hipervariables y de  
46 genes o segmentos conservados. Las comparaciones entre especies de árboles filogenéticos que

47 se infirieron de los datos de alineamientos escalonados y los datos hipervariables excluidos  
48 (alineamiento estandarizado), demuestran un mejoramiento en la confiabilidad y un mayor  
49 acuerdo tipológico con respecto a otras fuentes que contienen árboles filogenéticos hechos de  
50 datos más completos. Esta nueva forma escalonada de filogenia es una de los más comprensibles  
51 hasta la fecha (en términos de taxones y datos) y que pueden servir como una herramienta de  
52 amplificación para probar la hipótesis evolutiva de Zoanthidea.

53 **Keywords:** gene tree, hypervariable sequences, phylogeny-informed alignment, species tree,  
54 staggered alignment

55

## 56 **1. Introduction**

57 Nucleotide sequence-based molecular phylogenetics have been intensively applied to the  
58 Anthozoa order Zoanthidea, however our understanding of the evolutionary relationships among  
59 zoanthidean species has not progressed at the same pace. Since 2004, at least 107 phylogenetic  
60 trees that focus mostly or exclusively on Zoanthidea have been published in 46 reports (a rate of  
61 nearly 9 trees and 4 reports per year; Table 1). Within these trees, the mean number of species  
62 per tree is only 16.2, while the mean number of terminals is nearly three times as large, with  
63 some published trees containing <5% unique species among their terminals (Table 1).

64 Furthermore, of the 107 trees identified, 100 (or 94%) are gene trees relying upon a single gene  
65 or gene fragment rather than attempted species trees (see section 3.1), and 30% of these gene  
66 trees are built solely on data from the mitochondrial cytochrome oxidase subunit I gene (COI;  
67 Table 1). It has been known since at least 2002 that the rate of evolution of COI within Anthozoa  
68 is insufficient for distinguishing between closely related species and is largely uninformative for  
69 addressing phylogenetic questions below the family or genus-level (Shearer et al., 2002). The

70 details of these published trees suggest that the primary goal of phylogenetic research on this  
71 order could not be the relationships among species, but is more likely the exploration of gene  
72 evolution among specimens (see section 3.1). However, these gene trees have been generally  
73 used in species delimitation and are subsequently over-interpreted as species trees and molecular  
74 parataxonomic evidence of evolutionary relationships among species and higher taxa in the  
75 nearly complete absence of other data (see Swain et al., 2015; Swain et al., 2016; Swain and  
76 Swain, 2014 for further discussion of molecular parataxonomy).

77         Of the seven published zoanthidean trees that rely upon more than a single gene to  
78 support its inferences, only three (or 2.8% of the total) include attempted species trees based on  
79 analysis of concatenations (See section 3.1) of more than two genes originating from more than  
80 one genomic compartment (Table 1); even though this higher-level of genomic sampling (i.e.,  
81 multiple genes from multiple genomic compartments) is the standard minimum practice in  
82 molecular phylogenetics and is rapidly being overshadowed by the use of hundreds of genes or  
83 whole genomes as the basis of phylogentic reconstructions (phylogenomics). These three  
84 analyses include the 6 gene, 93 species (representing 11 genera across 5 families) tree of Swain  
85 (2010), the 3 gene, 29 species (representing 12 genera across 3 families) tree of Sinniger et al.  
86 (2013), and the 5 gene, 48 species (representing 14 genera across 2 families) tree of Montenegro  
87 et al (2016) (Table 1). None of these analyses are as comprehensive as is currently possible  
88 (Table S1), both in terms of data available for taxa (at least 144 species, 25 genera, 9 families)  
89 and genes (at least 6 genes). Additionally, analyses that include genes with divergent  
90 hypervariable regions (e.g. mitochondrial 16S or nuclear ITS; see sections 3.2–3.3) either ignore  
91 these data (e.g., Montenegro et al., 2016) or limit the scope of research to closely related species  
92 (e.g., Sinniger et al., 2013) to eliminate difficult homology assessments (but, see Swain, 2009,

93 2010). With the spectacular proliferation of gene trees and discarded datasets (see sections 3.2–  
94 3.3), along with poor representation of species and higher taxa (less than 65% of species and  
95 56% of genera and families for which there is available sequence for at least two genes are  
96 represented in any one of the previously published phylogenies), a comprehensive revision of the  
97 phylogeny of Zoanthidea seems warranted. Here, I present an updated comprehensive phylogeny  
98 for Zoanthidea and demonstrate that the use of a staggered sequence alignment to retain the  
99 evolutionary signal contained in hypervariable genes results in a more robust and defensible  
100 topology.

101

## 102 **2. Materials and Methods**

103 The phylogeny of Zoanthidea was revised to be current and comprehensive through  
104 maximum-likelihood inference applied to a concatenated multi-gene, multi-genomic alignment  
105 (see section 3.1). Nucleotide sequences of all unique Zoanthidea taxa, for which at least two  
106 different genes were available from GenBank, were included in the analysis (Table S1). Several  
107 of these genes contain hypervariable regions that are commonly used to differentiate species, but  
108 are also usually discarded for phylogenetic inference because of challenging homology  
109 assessments (see section 3.2). The effect of including hypervariable regions in tree inference (see  
110 section 3.3) was assessed through paired analyses: beginning with a reconstruction based on a  
111 staggered alignment that included every available nucleotide (see section 3.2, Fig. 1), followed  
112 by a reconstruction based on the identical alignment with an exclusion set to remove  
113 hypervariable positions and retain only conserved, universally alignable regions.

### 114 *2.1 Sampling strategy*

115 All Zoanthidea taxa with at least two different nucleotide sequences available in

116 GenBank for the six most commonly applied genes were included in the analyses. These genes  
117 include nuclear 18S, ITS, and 28S ribosomal RNA (rRNA) of the internal transcribed spacer  
118 (ITS) region and mitochondrial 12S and 16s rRNA and protein-coding COI (Table S1).  
119 Sequences were compiled by first targeting additional accessions available for the taxa used in  
120 the alignment of Swain (2010) (TreeBASE: S10492), and then expanding to include additional  
121 available taxa (that met the above criteria). Outgroup taxa were selected following Rodríguez et  
122 al. (2014) to include closely related *Relicanthus daphneae* and Antipatharia species and more  
123 distantly related Actiniaria species.

124 Identification of archived nucleotide sequences originating from unique species of  
125 Zoanthidea is challenging because of the rapid evolution of current taxonomic designations, the  
126 common practice of including unnamed and undescribed specimens without unique identifiers in  
127 previous phylogenetic analyses, use of molecular parataxonomy uncoupled from accepted  
128 species concepts for naming new taxa (see Mayden 1997 for a review of species concepts), and  
129 misidentification of taxa or substitution of contaminate sequences (in place of targeted taxa)  
130 within nucleotide databases (see Swain, 2010; Swain et al., 2015; Swain et al., 2016; Swain and  
131 Swain, 2014; and Table S1 for details of name usage tracking and examples of mislabeled  
132 accession identification). As a result, a simple search of GenBank for Zoanthidea will return a  
133 hodgepodge collection of intractable or incorrect identification labels attached to > 2,800  
134 accessions (last accessed on May 30, 2016; <http://www.ncbi.nlm.nih.gov/nucleotide>).

135 The only way to correctly identify which nucleotide sequences originate from the same  
136 specimens, and identify all available unique species (that meet the minimum genomic sampling  
137 detailed above), is to follow the usage of individual sequences through the 46 publications (and  
138 their associated supplemental files) and 107 molecular phylogenies that have been constructed

139 for Zoanthidea (Table 1, Table S1). This required tracking GenBank accessions, publication-  
140 specific taxon and specimen names, and in some cases creating species specific nucleotide  
141 alignments to compare intraspecific specimens and identify mislabeled sequences (e.g. Swain  
142 and Swain, 2014).

## 143 *2.2 Sequence alignment*

144 A concatenated alignment was assembled by integrating additional sequences into the  
145 existing staggered framework of a previously published multiple alignment for Zoanthidea. This  
146 included every nucleotide of all the sequences analyzed (complete-data) and is the staggered  
147 alignment (See Table S1 for the genes and gene segments used for each species). Gene sequences  
148 originating from GenBank were edited to remove amplification primers and single nucleotide  
149 insertions from protein coding genes. Sequences were added to the alignment of Swain (2010)  
150 (TreeBase: S10492) and aligned manually in Bioedit 7.2.5 (Hall, 1999) following the existing  
151 staggered framework for hypervariable regions ITS1 and ITS2, and hypervariable regions within  
152 16S and 12S (see section 3.2 for a description of theory, usage, and structure of staggered  
153 alignments and Table 2 for the alignment positions that were staggered). The sequences of the  
154 remaining three genes (18S, 28S, & COI), one gene segment (5.8S), and conserved regions of  
155 16S and 12S conform to the format of a standard universal alignment within the complete-data  
156 staggered alignment. The standard alignment is derived directly from the staggered alignment by  
157 excluding the staggered hypervariable regions (see section 2.3 and Table 2).

158 Hypervariable regions are divergent in both sequence identity and length and are only  
159 alignable with homologous sequences from closely-related species. The staggered regions of the  
160 matrix are a form of phylogeny-informed alignment, where sequences are added to the matrix  
161 proximal to closely-related taxa that were previously aligned (Morrison et al., 2015). This allows

162 visual detection and alignment of short sequences within hypervariable regions that are  
163 homologous in closely-related species, which are then isolated from divergent taxa within the  
164 matrix by inserting coding for unknown character states (question marks) in parallel matrix  
165 positions (see section 3.2). This creates a block of unambiguously aligned sequences and moves  
166 all divergent sequences further along the alignment, where the process is then repeated, resulting  
167 in the staggering of hypervariable regions. The initial assessment of sequence similarity is  
168 performed at the 5' terminus of ITS1, and is therefore dependent on the evolution of sequences in  
169 this region; however similarity is continuously reassessed while proceeding in the 3' direction  
170 and individual sequences may be aligned with different groups of species along the length of the  
171 alignment (all of which is completely documented in the TreeBase alignment accession:  
172 S20129). Using the previous framework ('jump-starting': Morrison, 2006) greatly simplifies the  
173 process as homologous sequences are already identified and adding new taxa requires relatively  
174 few adjustments.

### 175 *2.3 Model parameters and phylogenetic analyses*

176 The complete-data staggered alignment was partitioned for model-fitting and  
177 phylogenetic analysis, and species trees were independently inferred from the staggered  
178 (complete-data) and standard (hypervariable-excluded) alignments. Partitioning traced the  
179 boundaries of ribosomal subunits, staggered hypervariable regions, and codon positions  
180 (following Li et al., 2008) for model-fitting and phylogenetic analyses (Table 2), however branch  
181 length optimization was linked during tree inference due to incomplete per-partition taxon  
182 sampling. Parameters of nucleotide evolution of the General Time Reversible (GTR) model with  
183 gamma (+C) were determined simultaneously to phylogenetic inference using maximum-  
184 likelihood analysis of RAxML v8.2.8 (Stamatakis, 2014) in the CIPRES Science Gateway v3.3



185 (Miller et al., 2010) for the complete-data staggered alignment, and for the hypervariable  
186 exclusion set applied to the same alignment (i.e., the standard alignment). This exclusion set  
187 followed partitions applied to hypervariable regions (Table 2) and was used to assess the effect of  
188 the staggered, rapidly evolving data (see section 3.3). Nonparametric bootstrap support was  
189 estimated in RAxML using GTR and a categorical per-site rate heterogeneity approximation  
190 (CAT) from 1000 pseudoreplicates (Stamatakis, 2014). Edwardsiid Actiniaria species were  
191 designated as the outgroup.

192

### 193 **3. Theory**

#### 194 *3.1 Gene trees and species trees*

195 We have known, for more than 30 years, the critical distinction between gene trees and  
196 species trees (Pamilo and Nei, 1988). Gene trees, or phylogenetic inferences based upon a single  
197 gene, reconstruct the relationships among homologous variants of a gene sampled from different  
198 species and describes gene evolution. Species trees, or phylogenetic inferences based upon  
199 multiple genes or data sources, reconstruct the evolutionary histories of species and describes  
200 species evolution. Although both may use DNA sequence evolution as the basis of inference,  
201 gene evolution is not equivalent to species evolution (Pamilo and Nei, 1988), and analyses of  
202 species-level questions (e.g. species detection, identification, and systematics) based upon gene  
203 trees falsely assume equivalence in the evolution of genes and species.

204 This disparity between gene and species trees has multiple biological causes, but is  
205 ultimately due to the incomplete history of species that is provided by sampling a small  
206 proportion of their genomes. Evolutionary events such as gene deletion or duplication and  
207 horizontal gene transfer can cause dramatic differences in the evolutionary histories of genes and

208 species, but usually occur under specific circumstances, regions of the genome, or evolutionary  
209 lineages (Edwards, 2009). Conversely, differing evolutionary rates among genes, resulting in  
210 incomplete lineage sorting (ILS), or deep coalescence, and the related issues of branch length  
211 heterogeneity and heterotachy, appear to be universal issues that affect all genes, genomes  
212 (organelle or nucleus), and lineages (Edwards, 2009).

213         There are various approaches to reconstructing species trees, but all attempt to do so by  
214 incorporating multiple regions of the genome, and if possible multiple genomes, into the same  
215 tree inference. The two main approaches involve concatenation of multiple genes into the same  
216 alignment which is then used to infer a species tree, and alternatively inferring a tree from each  
217 gene which are then used to infer a species tree under a coalescence model. Which is the best  
218 approach for obtaining a highly supported and statically consistent inference is currently a source  
219 of active debate, as each approach makes specific assumptions and carry specific weaknesses  
220 (Edwards, 2009; Roch and Warnow, 2015; Springer and Gatesy 2016). There is a potential for  
221 concatenated analysis to return statistically inconsistent trees because of discordance in gene  
222 evolution (Degnan and Rosenberg, 2006; Rosenberg, 2013), which species tree-estimation based  
223 on gene trees can overcome (even in the anomaly zone; Liu et al., 2010); however discordance  
224 between Zoanthidea phylogenies based on nuclear and mitochondrial genes has been previously  
225 demonstrated to be insignificant (Swain, 2010). This assessment was performed at the genome-  
226 level rather than the gene-level because of incomplete taxon sampling of each gene, making  
227 comparable gene trees possible for only a few taxa. Additionally, datasets with incomplete taxon  
228 sampling (such as the case here) are predicted to be inferred with greater confidence using  
229 concatenation methods (Edwards, 2009). Regardless of the approach, incorporation of a greater  
230 volume and diversity of data into the inference should improve resolution and confidence in

231 comparison to gene trees.

### 232 *3.2 Staggered Alignments*

233 Multiple sequence alignment and tree inference are both critical to molecular  
234 phylogenetic analysis, however the quality and data content of tree inference is entirely  
235 dependent upon the quality and data content of alignment, as a phylogeny is a representation and  
236 interpretation of its underlying homology statements (Morrison, 2009a). Given the critical role of  
237 alignment as the primary homology assessment in phylogenetic inference, standard automated  
238 nucleotide sequence alignment is adept at assessing substitution events, but generally inadequate  
239 for generating homology hypotheses for most other common evolutionary events (e.g., deletion,  
240 duplication, insertion, inversion, and translocation; Morrison, 2009a). This limitation is generally  
241 not problematic for protein-coding regions because much of the evolutionary change observed in  
242 these sequences involves single residue substitutions and standard automated alignment based on  
243 sequence similarity can adequately assign homology within these events. However, only 1–20%  
244 of the genome of multicellular eukaryotes are composed of these conserved coding regions  
245 (Szymanski et al., 2007), leaving most genetic material and its evolutionary events not assessable  
246 by standard automated alignment (Morrison, 2009b). Additionally, many genes commonly  
247 applied to phylogenetic questions are not protein-coding and therefore most standard automated  
248 alignments of these genes contain misaligned sequences.

249 The main concern is over-alignment, or aligning sequences that are unlikely to be  
250 homologous. This issue is usually addressed in a standard alignment by excluding sequence  
251 regions with alignment challenges that are easily observable; meaning that even automated  
252 alignment requires manual correction to exclude low quality homology assessments (Morrison,  
253 2009b). There are multiple alternative approaches to refine alignments depending upon the

254 molecular function of the nucleotides involved (such as rRNA secondary structure prediction  
255 coupled with alignment correction or molecular morphometric analysis: e.g., Aguilar and  
256 Reimer, 2010; Swain and Taylor, 2003; Torres-Suarez, 2014), but all are focused on the same  
257 goal: retaining within the analysis as much information as possible (Morrison, 2009b).

258         One approach, which was commonly used prior to the wide-spread application of  
259 automated sequence alignment (Morrison, 2006), is the staggered alignment (Barta, 1997). A  
260 staggered alignment is a mosaic of local and universal nucleotide sub-alignments that are  
261 partially informed by phylogeny which allow the retention of all nucleotides (complete-data)  
262 without aligning non-homologues sequences (Morrison et al., 2015). This approach creates a  
263 single matrix that aligns homologous nucleotides within each sub-alignment: universal sub-  
264 alignments (equivalent to a standard alignment) are composed of conserved regions of the  
265 genome and include all taxa in the analysis, while local sub-alignments are composed of  
266 hypervariable regions of the genome and include only closely related taxa in each sub-alignment  
267 which are then staggered relative to other local sub-alignments (Fig. 1). A standard alignment can  
268 be derived directly from a staggered alignment by excluding the staggered local sub-alignments.

269         Like most standard automated alignment approaches, the staggered alignment relies upon  
270 sequence similarity to assess alignment quality, however it also benefits from the ability to  
271 examine multiple adjacent positions to specifically accommodate length variation among  
272 sequences. This approach can be initiated through automated alignment as a first approximation,  
273 but is completed through manual adjustment of nucleotide positioning following a single rule: do  
274 not align sequences that are not obviously homologous (Morrison, 2006). The resulting staggered  
275 alignment explicitly addresses our inability to simultaneously assess homology of complex  
276 evolutionary events across all targeted taxa, without discarding informative data. A standard

277 alignment would follow the identical procedure of automated alignment as a first approximation  
278 which is then completed through manual adjustment; however with a standard alignment, the  
279 manual adjustment discards hypervariable sequence data rather than making it available for  
280 phylogenetic inference. Phylogenetic trees inferred from the same DNA sequences using  
281 staggered alignments will differ from trees inferred from standard alignments in resolution,  
282 branch order, and node support within the terminal clades, but the internal order of cladogenesis  
283 will be similar because they rely upon similar data matrices (Barta 1997).

### 284 *3.3 Use of hypervariable regions in phylogenetic reconstruction*

285         The need for molecular markers that are informative at species and population levels has  
286 driven interest in capturing information contained in hypervariable regions of genomes. There is  
287 broad consensus that these regions contain informative variation, and they are widely used as  
288 species-level markers in many systems (Coleman, 2007; Forsman et al., 2009). Although  
289 mitochondrial outpaces nuclear sequence evolution in most organisms (Creer, 2007),  
290 mitochondrial sequence evolution is extraordinarily slow among anthozoans and is often  
291 invariant among its most closely-related species (Shearer et al., 2002). The nuclear ribosomal  
292 ITS region contains a mosaic of secondary structural elements that can be relatively conserved  
293 (stems) or variable (loops and buldges) (Hillis and Dixon, 1991), and evolve under complex and  
294 varied evolutionary constraints. Hypervariable ITS sequences can differ in both length and  
295 nucleotide identity, which can cause challenges in assessing homology for multiple sequence  
296 alignment. Additionally, the ITS array can be repeated hundreds or thousands of times within a  
297 single genome and the exact sequence of nucleotides in each copy are homogenized to varying  
298 degrees of completion and precision by concerted evolution (Elder and Turner, 1995; Hillis and  
299 Dixon, 1991); allowing for potential intragenomic variation.

300           These two issues, alignment challenges and intragenomic variation, are widely  
301   acknowledged as being the primary obstacles to successfully using hypervariable ITS sequences  
302   in phylogenetic inference. Alignment challenges can be mitigated by exclusively comparing  
303   regions with similar sequence length and identity through a staggered alignment (see section  
304   3.2), thereby increasing the probability of correct homology assessment at each matrix position.  
305   Intragenomic variation can be a more insidious problem, however intragenomic heterogeneity  
306   that is sufficient to mask evolutionary signal is often confined to specific taxonomic groups  
307   (Coleman, 2003, 2007). For example, within the Anthozoa order Scleractinia, ITS sequences  
308   have been broadly applied to phylogenetics (reviewed in Forsman et al., 2009; Kitahara et al.,  
309   2016), and extreme intragenomic heterogeneity is largely confined to the genus *Acropora* (Wei et  
310   al., 2006). Although intragenomic variation is not a common target for analysis within  
311   Zoanthidea, direct sequencing of ITS regions results in largely unambiguous sequence reads  
312   (suggesting that most copies are homogenized; e.g., Swain, 2009, 2010) and, if intragenomic  
313   heterogeneity is present, it appears to be generally insufficient to mask the evolutionary signal of  
314   species boundaries (but see Reimer et al., 2007c for example of hybridization) and intraspecific  
315   relationships (Aguilar and Reimer, 2010; Fujii and Reimer, 2011; Hibino et al., 2014; Irei et al.,  
316   2015; Kise and Reimer, 2016; Montenegro et al., 2016; Montenegro et al., 2015; Reimer et al.,  
317   2012a; Reimer and Fujii, 2010; Reimer et al., 2013a; Reimer et al., 2010c; Reimer et al., 2012b;  
318   Reimer et al., 2014; Reimer et al., 2008a; Reimer and Sinniger, 2010b; Reimer et al., 2008c;  
319   Reimer et al., 2007b; Risi and Macdonald, 2015; Risi and Macdonald, 2016; Sinniger et al.,  
320   2010a; Swain, 2009, 2010).

321

## 322   **4. Results and Discussion**

323 *4.1 Nucleotide alignment matrix*

324           The search of GenBank for novel taxon and gene sequences added 234 accessions (from  
325 97 species) to the 273 accessions (from 82 species) retained from the alignment of Swain (2010),  
326 for a total of 767 genes or gene segments from 144 Zoanthidea and 11 outgroup species,  
327 including representatives of nearly all known Zoanthidea genera (sequences of Epizoanthidae  
328 genera *Paleozoanthus* and *Thoracactis* are unavailable; Table S1). This includes 114 accessions  
329 of COI; a very short sequence (<600 nt) that codes for a subunit of an enzyme of the electron  
330 transport chain. As in other Anthozoa taxa, COI has long been known to be nearly useless for  
331 phylogenetic inference among closely-related species as its evolutionary rate is >100 times  
332 slower than most marine invertebrates (Hellberg, 2006; Shearer et al., 2002; Stampar et al.,  
333 2012). These COI sequences are included here only because these data are available, not to  
334 encourage continued investment in their collection, which should be seen as a misuse of limited  
335 resources expended upon an uninformative marker. The remaining 7 gene segments targeted in  
336 this analysis are incompletely sampled, such that the matrix contains 653 Zoanthidea genes or  
337 gene segments out of a possible 1008 (144 taxa x 7 gene segments). While incomplete data  
338 matrices are not desirable, maximum likelihood phylogenetic analyses are generally robust to  
339 missing data issues and including incompletely sampled genes generally increases their accuracy  
340 relative to excluding them (Jiang et al., 2014; Streicher et al., 2016). Collection of the missing  
341 sequences and completion of this matrix, along with bolstering data for species that have  
342 available sequences but did not meet the minimal requirements for inclusion here (e.g.  
343 *Isozoanthus sulcatus*), should be a focus of future research on improving the resolution and  
344 confidence in the Zoanthidea phylogeny. Completing this matrix will also allow a more  
345 comprehensive analysis of potential gene tree discordance than is currently possible, as well as

346 inferring statistically consistent species trees under a coalescence model if discordance is  
347 detected.

348         Once compiled, and properly staggered, the alignment contains >2.8 million matrix  
349 positions (155 rows by 18,075 columns; TreeBase: S20129). Alignment staggering represents a  
350 significant time commitment over automated multiple alignment alone, as hypervariable regions  
351 of small subsamples of taxa are individually assessed and manually adjusted. However, the  
352 resulting staggered alignment simultaneously maximizes information content and analysis power  
353 as it retains all nucleotides recovered from the original sequencing reads and allows the  
354 application of nucleotide evolutionary model-informed phylogenetic inference. There are  
355 alternative methods available, such as secondary structure prediction followed by alignment  
356 correction or molecular morphometric analysis (e.g., Aguilar and Reimer, 2010; Swain and  
357 Taylor, 2003; Torres-Suarez, 2014), but all retain less of the original sequence data or restrict the  
358 diversity of taxa that can be simultaneously analyzed and employ less powerful and robust  
359 analyses. Partitioning the data matrix resulted in twelve distinct models of nucleotide evolution,  
360 detailed in Table 2, that were applied in ML inferences of tree topology and bootstrap support.

#### 361 *4.2 Complete-data phylogenetic inference: analysis of the staggered alignment*

362         A search for the optimal ML tree from the partitioned staggered alignment resulted in a  
363 best tree with a likelihood score of -65296 (Fig. 2). This analysis recovered highly supported  
364 (bootstrap values of 100) monophylies of taxa representing order Zoanthidea and suborder  
365 Brachycnemina, with suborder Macrocnemina ancestral to Brachycnemina, and an overall tree  
366 topology that generally conforms to previously reported phylogenies that are of comparable  
367 taxon sampling (i.e. Sinniger et al., 2005; Swain, 2010).

368         Most currently recognized families were also recovered at a high-level of certainty



369 including Microzoanthidae, Epizoanthidae, Abysozoanthidae, Hydrozoanthidae, and Sphenopidae.  
370 Nanozoanthidae is monospecific and therefore impossible to assess. Parazoanthidae is both  
371 paraphyletic (with respect to Abysozoanthidae) and polyphyletic (with respect to *Isozoanthus*) and  
372 the relationships among genera are largely unresolved (i.e., extremely weak bootstrap support)  
373 except for monophyletic sister genera *Parazoanthus* and *Umimayanthus*. Other monophyletic  
374 Parazoanthidae genera include *Antipathozoanthus*, *Mesozoanthus*, *Zibrowius*, *Hurlizoanthus*,  
375 *Savalia*, and *Bergia*. *Corallizoanthus* is polyphyletic, and *Bullagummizoanthus*, *Kauluzoanthus*,  
376 and *Kulamanamana* are monospecific (and therefore impossible to assess); however the topology  
377 in this region of the tree generally lacks support due to the paucity of sequence data available for  
378 these taxa (which is almost entirely mitochondrial; Table S1). Clarification of these relationships  
379 should be a priority for future research and could be easily accomplished by adding highly  
380 informative ITS and 28S genes. Zoanthidae is paraphyletic with respect to Neozoanthidae, where  
381 the genus *Neozoanthus* is ancestral to *Isaurus*. Also within Zoanthidae, *Zoanthus* is paraphyletic  
382 with respect to *Acrozoanthus*. Although Sphenopidae is monophyletic, its daughter genus  
383 *Palythoa* is paraphyletic with respect to *Sphenopus*. Although there is much more confidence in  
384 this region of the tree, ~37% of the brachycnemic taxa are represented exclusively by  
385 mitochondrial genes in the data matrix and further resolution and confidence could be obtained  
386 by completing the matrix with information derived from the nuclear compartment.

#### 387 4.3 Hypervariable-excluded phylogenetic inference: analysis of the standard alignment

388 A search for the optimal ML tree from the partitioned standard alignment, (equivalent to  
389 the staggered alignment excluding hypervariable regions; Table 2), resulted in a best tree with a  
390 likelihood score of -31899 (Fig. 3). Although the exact branching order of the two trees varies,  
391 the overall topology of the hypervariable-excluded tree is largely congruent with the complete-

392 data tree, and apart from a few exceptions matches the monophylies of higher taxa detailed  
393 above. The hypervariable-excluded tree differs with a polyphyletic Sphenopidae, *Abyssoanthus*  
394 within *Parazoanthus*, *Acrozoanthus* basal to *Zoanthus* and *Zoanthus* as monophyletic, and  
395 *Sphenopus* basal to Brachycnemina. Additionally, the bootstrap values are ~15% lower in the  
396 hypervariable-excluded tree, with comparable nodes falling from a mean of 80.1 in the complete-  
397 data tree to 68.5 in the hypervariable-excluded tree.

#### 398 *4.4 Preferred topology: the complete-data inference based on the staggered alignment*

399         Given these competing topologies, the complete-data tree based on the staggered  
400 alignment best reflects our current understanding of molecular evolution, evolution of form, and  
401 systematics of Zoanthidea. The position of *Abyssoanthus* is generally problematic (and weakly  
402 supported in both inferences) because its nucleotide sequences are highly divergent (and  
403 therefore rarely included in phylogenetic analyses) and its anatomy is all but unknown (Reimer  
404 and Sinniger, 2010a; Reimer et al., 2007a); however, *Abyssoanthus* as sister to *Mesozoanthus* (as  
405 in the complete-data tree based on the staggered alignment) agrees with previous phylogenetic  
406 hypotheses (Reimer and Sinniger, 2010a; Reimer et al., 2007a) and the ecology of both taxa,  
407 whereas *Abyssoanthus* within *Parazoanthus* (as in the hypervariable-excluded tree based upon  
408 the standard alignment) would be a significant departure from our understanding of both genera.

409         In the hypervariable-excluded tree (based upon the standard alignment), Sphenopidae is  
410 polyphyletic because *Palythoa mizigama* is inferred to be part of the Zoanthidae monophyly.  
411 Zoanthidae and Sphenopidae have contrasting anatomical features (reviewed in Swain et al.,  
412 2016) and there is no indication that the morphology of *P. mizigama* differs from our  
413 understanding of *Palythoa* and Sphenopidae (Irei et al., 2015). *Acrozoanthus* and *Sphenopus* are  
414 both basal to their respective clades in the hypervariable-excluded tree (based upon the standard

415 alignment), supporting the validity of these genera; however, both are odd genera represented by  
416 few species that might best fit within other genera, as inferred in the complete-data tree (based  
417 upon the staggered alignment). *Acrozoanthus* is a mono-specific genus that was created because  
418 of its apparent ability to build an erect skeleton (Saville-Kent, 1893), however this skeleton was  
419 revealed to be the parchment-like tube of a worm in the genus *Eunice* (Ryland, 1997). Therefore  
420 skeleton-building is not the odd character of *Acrozoanthus*, rather is its ability to form symbiotic  
421 associations with polychaete worms (which is only common among zoanthideans in the genus  
422 *Epizoanthus* (Swain, 2010, Reimer et al., 2010a) and cannot help us to understand the  
423 relationship between *Acrozoanthus* and *Zoanthus*). Including *Acrozoanthus* within *Zoanthus* has  
424 been previously suggested using morphology (reviewed in Ryland, 1997) and molecular  
425 phylogenetics (e.g. Reimer et al., 2010c; Sinniger et al., 2005; Swain, 2010), and the complete-  
426 data tree (based upon the staggered alignment) agrees with this conclusion. *Sphenopus* is odd  
427 because it is solitary and azooxanthellate, whereas most of Sphenopidae are colonial and  
428 zooxanthellate. However, two recently described *Palythoa* species, *P. umbrosa* and *P. mizigama*,  
429 form colonies with small numbers of polyps and are uncharacteristically azooxanthellate (Irei et  
430 al., 2015). *Sphenopus* is part of a monophyly with *P. umbrosa* and *P. mizigama* within the  
431 *Palythoa* monophyly in the complete-data tree (based upon the staggered alignment), but these  
432 taxa are dispersed across the hypervariable-excluded tree (based upon the standard alignment).  
433 All of these major differences between these two trees suggest that the topology of the complete-  
434 data tree (based upon the staggered alignment) is a more accurate representation.

#### 435 *4.5 Novel hypotheses*

436 Although the complete-data tree (based upon the staggered alignment) is largely  
437 congruent with previous comparable phylogenies, it also supports novel hypotheses and

438 discredits others. Previous work on Microzoanthidae and Nanozoanthidae had placed these  
439 families within a monophyly with the Parazoanthidae genus *Isozoanthus* and as sister to the  
440 remaining Zoanthidea (Fujii and Reimer, 2011, 2013). The complete-data tree (based upon the  
441 staggered alignment) and the hypervariable-excluded tree (based upon the standard alignment)  
442 strongly supports the hypothesis that Microzoanthidae and Nanozoanthidae form an exclusive  
443 monophyly at the base of Zoanthidea and that *Isozoanthus* is sister to *Epizoanthus* (Fig. 2, 3).

444         The region of the complete-data tree (based upon the staggered alignment) containing the  
445 octocoral-symbiotic genera and their allies (*Bullagummizoanthus*, *Corallizoanthus*,  
446 *Hurlizoanthus*, *Kauluzoanthus*, *Kulamanamana*, *Savalia*, *Zibrowius*) lacks strong support, mostly  
447 because there are data for only 3 of 6 genes targeted in these analyses (Table S1), but suggests  
448 that many of these taxa could be congeneric. Unfortunately, along with the paucity of genetic  
449 data for these taxa, there is also very little anatomical data upon which a hypothesis could be  
450 based (Swain et al., 2016). There is considerable information about the genetics and anatomy of  
451 the three *Corallizoanthus* species included here (Swain, 2010; Swain et al., 2015; Swain et al.,  
452 2016; Swain and Swain, 2014), which could serve as guide for reexamination of the remaining  
453 taxa in this group. Resolving this portion of the tree should be a priority for future research.

454         At the base of the *Palythoa* monophyly is a strongly supported clade of taxa that is almost  
455 entirely comprised of species that were once assigned to the genus *Protopalythoa*. This includes  
456 *P. grandis*, *P. heliodiscus*, *P. variabilis*, but not others such as *P. grandiflora* and *P. mutuki*. The  
457 status of this genus has been in dispute for some time (Burnett et al., 1997, Low et al., 2016;  
458 Reimer et al., 2006c; Ryland and Lancaster, 2003), and the findings presented here do not settle  
459 this issue, but perhaps this novel hypothesis is an opening to reconsider the validity of  
460 *Protopalythoa*. Again, additional DNA sequence that could be used to complete the data matrix

461 could dramatically improve our understanding of the taxa in this region.

#### 462 *4.6 Sister of Zoanthidea*

463           Where the order Zoanthidea inserts into the Cnidaria Tree of Life has been one of the  
464 targets of sustained research and a point of contention (see Rodríguez et al., 2014 and references  
465 therein). Sister to Zoanthidea has been variously hypothesized to be either Actiniaria or  
466 Antipatharia, and its relationship with the remaining orders is poorly understood. The recent  
467 Actiniaria-focused inference by Rodríguez et al. (2014) put forth the novel hypothesis that the  
468 enigmatic species *Relicanthus daphneae* may be sister to Zoanthidea and both form a monophyly  
469 with Antipatharia, while Actinaria is much more distantly related. The Zoanthidea-focused  
470 analysis presented here included representatives of Antipatharia, Actiniaria, and *R. daphneae*,  
471 however the root of the phylogenetic inference was set only as the two undescribed Edwardsiidae  
472 species, allowing the remaining taxa to be placed according to the data. In this analysis *R.*  
473 *daphneae* is sister to Antipatharia and both form a monophyly with Zoanthidea (Fig. 1, 2). With  
474 the highly divergent sequences of *R. daphneae* and weak bootstrap support at its insertion, along  
475 with partially-overlapping taxon and datasets between the analysis presented here and Rodríguez  
476 et al. (2014), it would seem to remain an open question.

477

#### 478 **5. Conclusions**

479           Proliferation of Zoanthidea species and higher taxa descriptions since the year 2000, have  
480 occurred at a rate not seen for nearly 100 years (Swain et al., 2016). This explosion of discovery  
481 and identification of evolutionary patterns was triggered by the application of molecular  
482 phylogenetics to an order that was largely ignored because rampant confusion at the species and  
483 genus levels. Molecular tools have detected cryptic species and genera, both reinforced and

484 dismantled previous taxonomic and systematic hypotheses, and greatly expanded our  
485 understanding of Zoanthidea diversity. However, the tendency to, almost exclusively, construct  
486 gene trees based on many specimens of the same species (Table 1) as a tool of species discovery,  
487 has caused a parallel proliferation in published trees without a corresponding increase in the  
488 understanding of species phylogeny. The comprehensive phylogeny presented here is intended to  
489 fill that gap. Its utility is not in simply describing the proximate relationships of individual  
490 species as supported by the nucleotide data, as the phylogenies presented here are generally in  
491 agreement with previously published Zoanthidea species trees and many gene trees (but see  
492 section 4.5 for novel hypotheses). Rather the major advancement here is the inclusion of nearly  
493 all available species and nucleotide sequence data (including data that are usually discarded) into  
494 a single robust phylogeny (increasing resolution and node certainty) that can then serve as an  
495 expandable tool for performing higher-level assessments of evolutionary hypotheses and  
496 phylogeny-corrected statistical analyses (see exemplar analyses in Swain et al., 2015; Swain et  
497 al., 2016).

498         The absence of a comprehensive phylogeny can be traced to the disparity between the  
499 simplicity of alignment and the data content of the genes currently being applied to this group.  
500 Conserved genes can be easily aligned across taxa representing all genera and families of  
501 Zoanthidea, but produces poorly resolved and poorly supported trees. Hypervariable genes can  
502 provide the evolutionary signal necessary for topology resolution and confidence building, but  
503 creating the homology statements (sequence alignments) necessary for phylogenetic inference is  
504 a challenge. By staggering the alignment, it is possible to overcome the challenge of  
505 hypervariable sequence evolution while retaining its information. The complete-data tree based  
506 upon the staggered alignment provides a better supported topology that best matches our

507 understanding of evolution among Zoanthidea taxa. All major incongruencies between the  
508 hypervariable-excluded (based upon the standard alignment) and complete-data (based upon the  
509 staggered alignment) trees favor the hypothesis offered by the complete-data tree.

510

## 511 **Acknowledgments**

512 This work was supported by the US National Science Foundation [CBET-0937987,  
513 CBET-1240416, and OCE-0550599]; Northwestern University, Evanston, IL; the Field Museum  
514 of Natural History, Chicago, IL; and Florida State University, Tallahassee, FL; and L. Marcelino,  
515 and V. Backman of NU, R. Bieler of FMNH, and J. Wulff and S. Stepan of FSU. My original  
516 use of staggered alignments in phylogenetic analyses grew out of conversations on analyzing  
517 hypervariable sequences with S. Stepan.

518

## 519 **References**

520

521 Aguilar, C., Reimer, J.D., 2010. Molecular phylogenetic hypotheses of *Zoanthus* species  
522 (Anthozoa:Hexacorallia) using RNA secondary structure of the internal transcribed spacer 2  
523 (ITS2). *Marine Biodiversity* 40, 195–204.

524

525 Barta, J.R., 1997. Investigating phylogenetic relationships within the *Apicomplexa* using  
526 sequence data: The search for homology. *Methods-a Companion to Methods in Enzymology* 13,  
527 81–88.

528

529 Burnett, W.J., Benzie, J.A.H., Beardmore, J.A., Ryland, J.S., 1997. Zoanthids (Anthozoa,  
530 Hexacorallia) from the Great Barrier Reef and Torres Strait, Australia: Systematics, evolution  
531 and a key to species. *Coral Reefs* 16, 55–68.

532

533 Coleman, A.W., 2003. ITS2 is a double-edged tool for eukaryote evolutionary comparisons.  
534 *Trends in Genetics* 19, 370–375.

535

536 Coleman, A.W., 2007. Pan-eukaryote ITS2 homologies revealed by RNA secondary structure.  
537 *Nucleic Acids Research* 35, 3322–3329.

538

539 Creer, S., 2007. Choosing and using introns in molecular phylogenetics. *Evolutionary*  
540 *Bioinformatics* 3, 99–108.



- 541  
542 Degnan, J.H., Rosenberg, N.A., 2006. Discordance of species trees with their most likely gene  
543 trees. PLoS Genetics, pp. 762–768.  
544
- 545 Edwards, S.V., 2009. Is a new and general theory of molecular systematics emerging? Evolution  
546 63, 1-19.  
547
- 548 Elder, J.F., Turner, B.J., 1995. Concerted evolution of repetitive DNA sequences in eukaryotes.  
549 Quarterly Review of Biology 70, 297–320.  
550
- 551 Forsman, Z.H., Barshis, D.J., Hunter, C.L., Toonen, R.J., 2009. Shape-shifting corals: molecular  
552 markers show morphology is evolutionarily plastic in *Porites*. BMC Evolutionary Biology 9, 45.  
553
- 554 Fujii, T., Reimer, J.D., 2011. Phylogeny of the highly divergent zoanthid family Microzoanthidae  
555 (Anthozoa, Hexacorallia) from the Pacific. Zoologica Scripta 40, 418–431.  
556
- 557 Fujii, T., Reimer, J.D., 2013. A new family of diminutive zooxanthellate zoanthids (Hexacorallia:  
558 Zoantharia). Zoological Journal of the Linnean Society 169, 509–522.  
559
- 560 Hall, T.A., 1999. BioEdit: a user-friendly biological sequence alignment editor and analysis  
561 program for Windows 95 /98 /NT. Nucleic Acid Symposium Series, pp. 95–98.  
562
- 563 Hellberg, M.E., 2006. No variation and low synonymous substitution rates in coral mtDNA  
564 despite high nuclear variation. BMC Evolutionary Biology 6, 24  
565
- 566 Hibino, Y., Todd, P.A., Yang, S.-y., Benayahu, Y., Reimer, J.D., 2014. Molecular and  
567 morphological evidence for conspecificity of two common Indo-Pacific species of *Palythoa*  
568 (Cnidaria: Anthozoa). Hydrobiologia 733, 31–43.  
569
- 570 Hillis, D.M., Dixon, M.T., 1991. Ribosomal DNA: molecular evolution and phylogenetic  
571 inference. Quarterly Review of Biology 66, 411–453.  
572
- 573 Irei, Y., Sinniger, F., Reimer, J.D., 2015. Descriptions of two azooxanthellate *Palythoa* species  
574 (Subclass Hexacorallia, Order Zoantharia) from the Ryukyu Archipelago, southern Japan.  
575 Zookeys 478, 1–26.  
576
- 577 Jiang, W., Chen, S.Y., Wang, H., Li, D.Z., Wiens, J.J., 2014. Should genes with missing data be  
578 excluded from phylogenetic analyses? Molecular Phylogenetics and Evolution 80, 308–318.  
579
- 580 Kise, H., Reimer, J.D., 2016a. Unexpected diversity and a new species of *Epizoanthus*  
581 (Anthozoa, Hexacorallia) attached to eunicid worm tubes from the Pacific Ocean. Zookeys 562,  
582 49–71.  
583
- 584 Kitahara, M.V., Fukami, H., Benzoni, F., Huang, D., 2016. The new systematics of Scleractinia:  
585 integrating molecular and morphological evidence. In: Goffredo, S., Dubinsky, Z. (Eds.), The  
586 Cnidaria, Past, Present and Future: The world of Medusa and her sisters. Springer International



- 587 Publishing, pp. 41–59.  
588
- 589 Koupaei, A.N., Mostafavi, P.G., Mehrabadi, J.F., Fatemi, S.M.R., 2014. Molecular diversity of  
590 coral reef-associated zoanthids off Qeshm Island, northern Persian Gulf. *International Aquatic*  
591 *Research* 6, 64.  
592
- 593 Koupaei, A.N., Mostafavi, P.G., Mehrabadi, J.F., Fatemi, S.M.R., Dehghani, H., 2016. Diversity  
594 of shallow water zoantharians in Hengam and Larak Islands, in the Persian Gulf. *Journal of the*  
595 *Marine Biological Association of the United Kingdom* 96, 1145–1155.  
596
- 597 Li, C., Lu, G., Orti, G., 2008. Optimal data partitioning and a test case for ray-finned fishes  
598 (Actinopterygii) based on ten nuclear loci. *Systematic Biology* 57, 519–539.  
599
- 600 Liu, L.A., Yu, L.L., Edwards, S.V., 2010. A maximum pseudo-likelihood approach for estimating  
601 species trees under the coalescent model. *BMC Evolutionary Biology* 10, 302.  
602
- 603 Miller, M.A., Pfeiffer, W., Schwartz, T., 2010. Creating the CIPRES Science Gateway for  
604 inference of large phylogenetic trees. *Gateway Computing Environments Workshop (GCE)*, New  
605 Orleans, LA, pp. 1–8.  
606
- 607 Montenegro, J., Low, M.E.Y., Reimer, J.D., 2016. The resurrection of the genus *Bergia*  
608 (Anthozoa, Zoantharia, Parazoanthidae). *Systematics and Biodiversity* 14, 63–73.  
609
- 610 Montenegro, J., Sinniger, F., Reimer, J.D., 2015. Unexpected diversity and new species in the  
611 sponge-Parazoanthidae association in southern Japan. *Molecular Phylogenetics and Evolution*  
612 89, 73–90.  
613
- 614 Morrison, D.A., 2006. Multiple sequence alignment for phylogenetic purposes. *Australian*  
615 *Systematic Botany* 19, 479–539.  
616
- 617 Morrison, D.A., 2009a. A framework for phylogenetic sequence alignment. *Plant Systematics*  
618 *and Evolution* 282, 127–149.  
619
- 620 Morrison, D.A., 2009b. Why would phylogeneticists ignore computerized sequence alignment?  
621 *Systematic Biology* 58, 150–158.  
622
- 623 Morrison, D.A., Morgan, M.J., Kelchner, S.A., 2015. Molecular homology and multiple-  
624 sequence alignment: an analysis of concepts and practice. *Australian Systematic Botany* 28, 46–  
625 62.  
626
- 627 Pamilo, P., Nei, M., 1988. Relationships between gene trees and species trees. *Molecular Biology*  
628 *and Evolution* 5, 568–583.  
629
- 630 Reimer, J.D., Foord, C., Yuka Irei, Y., 2012a. Species diversity of shallow water zoanthids  
631 (Cnidaria: Anthozoa: Hexacorallia) in Florida. *Journal of Marine Biology* 2012, 856079.  
632

- 633 Reimer, J.D., Fujii, T., 2010. Four new species and one new genus of zoanthids (Cnidaria,  
634 Hexacorallia) from the Galapagos Islands. *Zookeys*, 1–36.  
635
- 636 Reimer, J.D., Hirose, M., Irei, Y., Obuchi, M., Sinniger, F., 2011a. The sands of time: rediscovery  
637 of the genus *Neozoanthus* (Cnidaria: Hexacorallia) and evolutionary aspects of sand incrustation  
638 in brachycnemic zoanthids. *Marine Biology* 158, 983–993.  
639
- 640 Reimer, J.D., Hirose, M., Nishisaka, T., Sinniger, F., Itani, G., 2010a. *Epizoanthus* spp.  
641 associations revealed using DNA markers: A case study from Kochi, Japan. *Zoological Science*  
642 27, 729–734.  
643
- 644 Reimer, J.D., Hirose, M., Wirtz, P., 2010b. Zoanthids of the Cape Verde Islands and their  
645 symbionts: previously unexamined diversity in the Northeastern Atlantic. *Contributions to*  
646 *Zoology* 79, 147–163.  
647
- 648 Reimer, J.D., Hirose, M., Yanagi, K., Sinniger, F., 2011b. Marine invertebrate diversity in the  
649 oceanic Ogasawara Islands: a molecular examination of zoanthids (Anthozoa: Hexacorallia) and  
650 their *Symbiodinium* (Dinophyceae). *Systematics and Biodiversity* 9, 133–143.  
651
- 652 Reimer, J.D., Irei, Y., Fujii, T., Yang, S.Y., 2013a. Molecular analyses of shallow-water  
653 zooxanthellate zoanthids (Cnidaria: Hexacorallia) from Taiwan and their *Symbiodinium* spp.  
654 *Zoological Studies* 52, 38.  
655
- 656 Reimer, J.D., Irei, Y., Naruse, T., 2013b. A record of *Neozoanthus cf. uchina* Reimer, Irei & Fujii,  
657 2012 from the Yaeyama Islands, southern Ryukyu Islands, Japan. *Fauna Ryukyuan* 1–7.  
658
- 659 Reimer, J.D., Ishikawa, S.A., Hirose, M., 2010c. New records and molecular characterization of  
660 *Acrozoanthus* (Cnidaria: Anthozoa: Hexacorallia) and its endosymbionts (*Symbiodinium* spp.)  
661 from Taiwan. *Marine Biodiversity* 41, 313–323.  
662
- 663 Reimer, J.D., Lin, M., Fujii, T., Lane, D.J.W., Hoeksema, B.W., 2012b. The phylogenetic  
664 position of the solitary zoanthid genus *Sphenopus* (Cnidaria: Hexacorallia). *Contributions to*  
665 *Zoology* 81, 43–54.  
666
- 667 Reimer, J.D., Lorion, J., Irei, Y., Hoeksema, B., Wirtz, P., 2014. Ascension Island shallow-water  
668 Zoantharia (Hexacorallia: Cnidaria) and their zooxanthellae (*Symbiodinium*). *Journal of the*  
669 *Marine Biological Association of the United Kingdom* doi:10.1017/S0025315414000654.  
670
- 671 Reimer, J.D., Nonaka, M., Sinniger, F., Iwase, F., 2008a. Morphological and molecular  
672 characterization of a new genus and new species of parazoanthid (Anthozoa: Hexacorallia:  
673 Zoantharia) associated with Japanese Red Coral. *Coral Reefs* 27, 935–949.  
674
- 675 Reimer, J.D., Ono, S., Fujiwara, Y., Takishita, K., Tsukahara, J., 2004. Reconsidering *Zoanthus*  
676 spp. diversity: Molecular evidence of conspecificity within four previously presumed species.  
677 *Zoological Science* 21, 517–525.  
678

- 679 Reimer, J.D., Ono, S., Iwama, A., Takishita, K., Tsukahara, J., Maruyama, T., 2006a.  
680 Morphological and molecular revision of *Zoanthus* (Anthozoa: Hexacorallia) from southwestern  
681 Japan, with descriptions of two new species. *Zoological Science* 23, 261–275.  
682
- 683 Reimer, J.D., Ono, S., Iwama, A., Tsukahara, J., Maruyama, T., 2006b. High levels of  
684 morphological variation despite close genetic relatedness between *Zoanthus aff. vietnamensis*  
685 and *Zoanthus kuroshio* (Anthozoa : Hexacorallia). *Zoological Science* 23, 755–761.  
686
- 687 Reimer, J.D., Ono, S., Takishita, K., Tsukahara, J., Maruyama, T., 2006c. Molecular evidence  
688 suggesting species in the zoanthid genera *Palythoa* and *Protopalyythoa* (Anthozoa : Hexacorallia)  
689 are congeneric. *Zoological Science* 23, 87–94.  
690
- 691 Reimer, J.D., Ono, S., Tsukahara, J., Iwase, F., 2008b. Molecular characterization of the zoanthid  
692 genus *Isaurus* (Anthozoa : Hexacorallia) and associated zooxanthellae (*Symbiodinium* spp.) from  
693 Japan. *Marine Biology* 153, 351–363.  
694
- 695 Reimer, J.D., Sinniger, F., 2010a. Discovery and description of a new species of *Abyssoanthus*  
696 (Zoantharia: Hexacorallia) at the Japan Trench: the world's deepest known zoanthid. *Cahiers De*  
697 *Biologie Marine* 51, 451–457.  
698
- 699 Reimer, J.D., Sinniger, F., 2010b. Unexpected diversity in Canadian Pacific zoanthids (Cnidaria:  
700 Anthozoa: Hexacorallia): a molecular examination and description of a new species from the  
701 waters of British Columbia. *Marine Biodiversity* 40, 249–260.  
702
- 703 Reimer, J.D., Sinniger, F., Fujiwara, Y., Hirano, S., Maruyama, T., 2007a. Morphological and  
704 molecular characterisation of *Abyssoanthus nankaiensis*, a new family, new genus and new  
705 species of deep-sea zoanthid (Anthozoa : Hexacorallia : Zoantharia) from a north-west Pacific  
706 methane cold seep. *Invertebrate Systematics* 21, 255–262.  
707
- 708 Reimer, J.D., Sinniger, F., Hickman, C.P., 2008c. Zoanthid diversity (Anthozoa : Hexacorallia) in  
709 the Galapagos Islands: a molecular examination. *Coral Reefs* 27, 641–654.  
710
- 711 Reimer, J.D., Takishita, K., Ono, S., Maruyama, T., 2007b. Diversity and evolution in the  
712 zoanthid genus *Palythoa* (Cnidaria : Hexacorallia) based on nuclear ITS-rDNA. *Coral Reefs* 26,  
713 399–410.  
714
- 715 Reimer, J.D., Takishita, K., Ono, S., Tsukahara, J., Maruyama, T., 2007c. Molecular evidence  
716 suggesting interspecific hybridization in *Zoanthus* spp. (Anthozoa: Hexacorallia). *Zoological*  
717 *Science* 24, 346–359.  
718
- 719 Reimer, J.D., Todd, P.A., 2009. Preliminary molecular examination of zooxanthellate zoanthids  
720 (Hexacorallia: Zoantharia) and associated zooxanthellae (*Symbiodinium* spp.) diversity in  
721 Singapore. *Raffles Bulletin of Zoology* 22, 103–120.  
722
- 723 Risi, M.M., Macdonald, A.H.H., 2015. Possible synonymies of *Zoanthus* (Anthozoa:  
724 Hexacorallia) species on the east coast of South Africa with Pacific congeners. *Systematics and*

- 725 Biodiversity 13, 93–103.  
726
- 727 Risi, M.M., Macdonald, A.H.H., 2016. Molecular examination of rocky shore brachycnemic  
728 zoantharians (Anthozoa: Hexacorallia) and their *Symbiodinium* symbionts (Dinophyceae) in the  
729 southwest Indian Ocean. *Marine Biodiversity* 46, 113–127.  
730
- 731 Roch, S., Warnow, T., 2015. On the robustness to gene tree estimation error (or lack thereof) of  
732 coalescent-based species tree methods. *Systematic Biology* 64, 663–676.  
733
- 734 Rodríguez, E., Barbeitos, M.S., Brugler, M.R., Crowley, L.M., Grajales, A., Gusmão, L.,  
735 Häussermann, V., Reft, A., Daly, M., 2014. Hidden among sea anemones: The first  
736 comprehensive phylogenetic reconstruction of the order actiniaria (Cnidaria, Anthozoa,  
737 Hexacorallia) reveals a novel group of hexacorals. *PLoS One* 9, e96998.  
738
- 739 Rosenberg, N.A., 2013. Discordance of species trees with their most likely gene trees: a unifying  
740 principle. *Molecular Biology and Evolution* 30, 2709–2713.  
741
- 742 Ryland, J.S., 1997. Budding in *Acrozoanthus* Saville-Kent, 1893 (Anthozoa: Zoanthidea). In: den  
743 Hartog, J. (Ed.), 6th International Conference on Coelenterate Biology. Nationaal  
744 Natuurhistorisch Museum, pp. 423–428.  
745
- 746 Ryland, J.S., Lancaster, J.E., 2003. Revision of methods for separating species of *Protopalythoa*  
747 (Hexacorallia: Zoanthidea) in the tropical West Pacific. *Invertebrate Systematics* 17, 407–428.  
748
- 749 Santos, M.E.A., Kitahara, M.V., Lindner, A., Reimer, J.D., 2015. Overview of the order  
750 Zoantharia (Cnidaria: Anthozoa) in Brazil. *Marine Biodiversity* 46, 547–559.  
751
- 752 Saville-Kent, W., 1893. The Great Barrier Reef of Australia: its products and potentialities.  
753 Allen, W.H., London. pp. 1–387.  
754
- 755 Shearer, T.L., Van Oppen, M.J.H., Romano, S.L., Worheide, G., 2002. Slow mitochondrial DNA  
756 sequence evolution in the Anthozoa (Cnidaria). *Molecular Ecology* 11, 2475–2487.  
757
- 758 Shiroma, E., Reimer, J.D., 2010. Investigations into the reproductive patterns, ecology, and  
759 morphology in the zoanthid genus *Palythoa* (Cnidaria: Anthozoa: Hexacorallia) in Okinawa,  
760 Japan. *Zoological Studies* 49, 182–194.  
761
- 762 Sinniger, F., Häussermann, V., 2009. Zoanthids (Cnidaria: Hexacorallia: Zoantharia) from  
763 shallow waters of the southern Chilean fjord region, with descriptions of a new genus and two  
764 new species. *Organisms Diversity & Evolution* 9, 23–36.  
765
- 766 Sinniger, F., Montoya-Burgos, J.I., Chevaldonne, P., Pawlowski, J., 2005. Phylogeny of the order  
767 Zoantharia (Anthozoa, Hexacorallia) based on the mitochondrial ribosomal genes. *Marine*  
768 *Biology* 147, 1121–1128.  
769
- 770 Sinniger, F., Ocana, O.V., Baco, A.R., 2013. Diversity of zoanthids (Anthozoa: Hexacorallia) on

- 771 Hawaiian seamounts: Description of the Hawaiian gold coral and additional zoanths. PLoS One  
772 8, e52607.  
773
- 774 Sinniger, F., Reimer, J.D., Pawlowski, J., 2008. Potential of DNA sequences to identify zoanths  
775 (Cnidaria: Zoantharia). Zoological Science 25, 1253–1260.  
776
- 777 Sinniger, F., Reimer, J.D., Pawlowski, J., 2010a. The Parazoanthidae (Hexacorallia: Zoantharia)  
778 DNA taxonomy: description of two new genera. Marine Biodiversity, 57–70.  
779
- 780 Sinniger, F., Zelnio, K.A., Taviani, M., Reimer, J.D., 2010b. Presence of *Abyssoanthus* sp.  
781 (Anthozoa: Zoantharia) in the Mediterranean Sea: an indication of non-dependence of  
782 *Abyssoanthus* to chemosynthetic-based ecosystems. Cahiers De Biologie Marine 51, 475–478.  
783
- 784 Springer, M.S., Gatesy, J., 2016. The gene tree delusion. Molecular Phylogenetics and Evolution  
785 94, 1–33.  
786
- 787 Stamatakis, A., 2014. RAxML Version 8: A tool for Phylogenetic Analysis and Post-Analysis of  
788 Large Phylogenies. Bioinformatics 30, 1312–1313.  
789
- 790 Stampar, S.N., Maronna, M.M., Vermeij, M.J.A., Silveira, F.L.D., Morandini, A.C., 2012.  
791 Evolutionary diversification of banded tube-dwelling anemones (Cnidaria; Ceriantharia;  
792 *Isarachnanthus*) in the Atlantic Ocean. PLoS One 9, e109481.  
793
- 794 Streicher, J.W., Schulte, J.A., Wiens, J.J., 2016. How should genes and taxa be sampled for  
795 phylogenomic analyses with missing data? An empirical study in iguanian lizards. Systematic  
796 Biology 65, 128–145.  
797
- 798 Swain, T.D., 2009. Phylogeny-based species delimitations and the evolution of host associations  
799 in symbiotic zoanths (Anthozoa, Zoanthidea) of the wider Caribbean region. Zoological  
800 Journal of the Linnean Society 156, 223–238.  
801
- 802 Swain, T.D., 2010. Evolutionary transitions in symbioses: dramatic reductions in bathymetric  
803 and geographic ranges of Zoanthidea coincide with loss of symbioses with invertebrates.  
804 Molecular Ecology 19, 2587–2598.  
805
- 806 Swain, T.D., Schellinger, J.L., Strimaitis, A.M., Reuter, K.E., 2015. Evolution of anthozoan  
807 polyp retraction mechanisms: convergent functional morphology and evolutionary allometry of  
808 the marginal musculature in order Zoanthidea (Cnidaria: Anthozoa: Hexacorallia). BMC  
809 Evolutionary Biology 15, 123.  
810
- 811 Swain, T.D., Strimatis, A.M., Reuter, K.E., Boudreau, W., 2016. Towards integrative systematics  
812 of Anthozoa (Cnidaria): Evolution of form in the order Zoanthidea. Zoologica Scripta DOI:  
813 10.1111/zsc.12195.  
814
- 815 Swain, T.D., Swain, L.M., 2014. Molecular parataxonomy as taxon description: examples from  
816 recently named Zoanthidea (Cnidaria: Anthozoa) with revision based on serial histology of

817 microanatomy. *Zootaxa* 3796, 81–107.

818

819 Swain, T.D., Taylor, D.J., 2003. Structural rRNA characters support monophyly of raptorial  
820 limbs and paraphyly of limb specialization in water fleas. *Proceedings of the Royal Society B-*  
821 *Biological Sciences* 270, 887–896.

822

823 Szymanski, M., Erdmann, V.A., Barciszewski, J., 2007. Noncoding RNAs database (ncRNAdb).  
824 *Nucleic Acids Research* 35, D162–D164.

825

826 Torres-Suarez, O.L., 2014. *Gorgonia mariae* and *Antillogorgia bipinnata* populations inferred  
827 from compensatory base change analysis of the internal transcribed spacer 2. *Molecular*  
828 *Phylogenetics and Evolution* 79, 240–248.

829

830 Wei, N.W.V., Wallace, C.C., Dai, C.F., Pillay, K.R.M., Chen, C.A., 2006. Analyses of the  
831 ribosomal internal transcribed spacers (ITS) and the 5.8S gene indicate that extremely high  
832 rDNA heterogeneity is a unique feature in the scleractinian coral genus *Acropora* (Scleractinia;  
833 Acroporidae). *Zoological Studies* 45, 404–418.

834

### 835 **Figure and table captions**

836 **Table 1.** Review of published Zoanthidea molecular phylogenies inferred from nucleotide

837 sequences, including the source reference (Reference), figure number of the phylogeny within

838 that source (Fig.), number of apparent species in each phylogeny (Sp.), number of terminals in

839 each phylogeny (Term.), outgroup employed in each phylogeny (Outgroup), genes used in the

840 inference of each phylogeny (Genes), and the genomic compartment sampled by the genes used

841 to infer each phylogeny (Genome). \*Reimer et al., 2007b; Fig. 4.

842

843 **Table 2.** Partition definitions and per-partition parameter estimates used to model sequence

844 evolution for phylogenetic inference. Hypervariable regions that were staggered in the staggered

845 alignment, or excluded in the standard alignment, are alignment partitions ITS1, ITS2, 16S-HV,

846 and 12S-HV.

847

848 **Figure 1.** Example matrices aligned by standard (a) and staggered (b) protocols. Note that the



849 standard alignment is “over-aligned”, assuming homology where it is unlikely.

850

851 **Figure 2.** Complete-data tree. Maximum likelihood phylogeny of Zoanthidea based on a  
852 staggered alignment of concatenated nuclear (18S, ITS1, 5.8S, ITS2, & 28S) and mitochondrial  
853 (12S & 16S) ribosomal RNA and mitochondrial protein-coding (COI) nucleotide sequences.  
854 Support indicated by 1000 pseudoreplicate maximum likelihood bootstrap values. Taxonomic  
855 notations: order, Ac = Actiniaria, An = Antipatharia; family, M = Microzoanthidae, black bar =  
856 Nanozoanthidae, gray diagonal lines = Parazoanthidae, gray bar = Abysoanthidae, Hydrozoanth  
857 = Hydrozoanthidae, gray horizontal line = Zoanthidae, N = Neozoanthidae.

858

859 **Figure 3.** Hypervariable-excluded tree. Maximum likelihood phylogeny of Zoanthidea based on  
860 standard alignment of concatenated nuclear (18S, 5.8S, & 28S) and mitochondrial (12S & 16S)  
861 ribosomal RNA and mitochondrial protein-coding (COI) nucleotide sequences, with  
862 hypervariable regions of 12S & 16S (12S-HV, 16S-HV; Table 2) excluded. Support indicated by  
863 1000 pseudoreplicate maximum likelihood bootstrap values. Taxonomic notations: order, Ac =  
864 Actiniaria, An = Antipatharia; family, M = Microzoanthidae, black bar = Nanozoanthidae, gray  
865 diagonal lines = Parazoanthidae, gray bar = Abysoanthidae, Hydrozoanth = Hydrozoanthidae,  
866 gray horizontal line = Zoanthidae, N = Neozoanthidae.

867

868 **Table S1.** Zoanthidea specimens and GenBank accession numbers for each of the sequences  
869 used for phylogenetic inference. Accessions of sequences not included in the alignment of Swain  
870 (2010) (TreeBASE: S10492) are in bold.

**Table 1.**

| Reference                      | Fig. | Sp. | Term. | Outgroup              | Genes                  | Genome |
|--------------------------------|------|-----|-------|-----------------------|------------------------|--------|
| Reimer et al., 2004            | 4    | 4   | 29    | <i>Palythoa</i>       | COI                    | Mit    |
| Sinniger et al., 2005          | 3    | 21  | 25    | Actininarina          | 16S, 12S               | Mit    |
| Reimer et al., 2006b           | 2a   | 5   | 13    | <i>Palythoa</i>       | 16S                    | Mit    |
| Reimer et al., 2006b           | 2b   | 5   | 16    | <i>Palythoa</i>       | 5.8S                   | Nuc    |
| Reimer et al., 2006c           | 3    | 8   | 29    | <i>Parazoanthus</i>   | COI                    | Mit    |
| Reimer et al., 2006c           | 4    | 8   | 12    | <i>Parazoanthus</i>   | 16S                    | Mit    |
| Reimer et al., 2006a           | 10   | 6   | 47    | <i>Parazoanthus</i>   | COI                    | Mit    |
| Reimer et al., 2006a           | 11   | 6   | 15    | <i>Parazoanthus</i>   | 16S                    | Mit    |
| Reimer et al., 2007b           | 3    | 8   | 52    | <i>Zoanthus</i>       | 16S                    | Mit    |
| Reimer et al., 2007b           | 4    | 5   | 67    | <i>Palythoa</i>       | ITS                    | Nuc    |
| Reimer et al., 2007c           | 3    | 4   | 50    | <i>Parazoanthus</i>   | COI                    | Mit    |
| Reimer et al., 2007c           | 4    | 4   | 92    | <i>Parazoanthus</i>   | 5.8S                   | Nuc    |
| Reimer et al., 2007a           | 3    | 25  | 30    | Scler. & Actin.       | COI                    | Mit    |
| Reimer et al., 2007a           | 4    | 20  | 23    | Scler. & Actin.       | 16S                    | Mit    |
| Reimer et al., 2008a           | 5    | 15  | 23    | <i>Abyssoanthus</i>   | 16S                    | Mit    |
| Reimer et al., 2008a           | 6    | 21  | 31    | <i>Abyssoanthus</i>   | COI                    | Mit    |
| Reimer et al., 2008a           | 7    | 5   | 9     | <i>Parazoanthus</i>   | ITS                    | Nuc    |
| Reimer et al., 2008c           | 2    | 22  | 40    | Epizoanthidae         | 16S                    | Mit    |
| Reimer et al., 2008c           | 3    | 26  | 46    | Epizoanthidae         | COI                    | Mit    |
| Reimer et al., 2008c           | 4    | 4   | 15    | <i>Parazoanthus</i>   | ITS                    | Nuc    |
| Sinniger et al., 2008          | 1    | 36  | 54    | Epizoanthidae         | COI                    | Mit    |
| Reimer et al., 2008c           | 2    | 36  | 54    | Epizoanthidae         | 16S                    | Mit    |
| Reimer et al., 2008b           | 3    | 13  | 24    | <i>Parazoanthus</i>   | 16S                    | Mit    |
| Reimer et al., 2008b           | 4    | 11  | 27    | <i>Parazoanthus</i>   | COI                    | Mit    |
| Sinniger and Haussermann, 2009 | 2    | 41  | 59    | Epizoanthidae         | COI, 16S               | Mit    |
| Reimer and Todd, 2009          | 3    | 11  | 22    | <i>Parazoanthus</i>   | 16S                    | Mit    |
| Reimer and Todd, 2009          | 4    | 10  | 44    | <i>Parazoanthus</i>   | COI                    | Mit    |
| Swain, 2009                    | 1    | 10  | 64    | Actininarina          | ITS                    | Nuc    |
| Swain, 2009                    | 2    | 17  | 17    | Actininarina          | 16S                    | Mit    |
| Reimer and Sinniger, 2010a     | 1    | 21  | 27    | Epizoanthidae         | 16S                    | Mit    |
| Sinniger et al., 2010b         | 1    | 40  | 56    | Epizoanthidae         | 16S                    | Mit    |
| Sinniger et al., 2010a         | 3    | 35  | 48    | <i>Isozoanthus</i>    | COI                    | Mit    |
| Sinniger et al., 2010a         | 4    | 36  | 51    | Epizoanthidae         | 16S                    | Mit    |
| Sinniger et al., 2010a         | 5    | 38  | 79    | Epizoanthidae         | ITS                    | Nuc    |
| Reimer et al., 2010a           | 2a   | 9   | 17    | <i>H. gracilis</i>    | 16S                    | Mit    |
| Reimer et al., 2010a           | 2b   | 10  | 18    | <i>H. gracilis</i>    | COI                    | Mit    |
| Reimer et al., 2010b           | 3a   | 31  | 42    | Parazoanthidae        | 16S                    | Mit    |
| Reimer et al., 2010b           | 3b   | 33  | 47    | –                     | COI                    | Mit    |
| Shiroma and Reimer, 2010*      | 3    | 5   | 67    | <i>P. heliodiscus</i> | ITS                    | Mit    |
| Reimer et al., 2010c           | 3a   | 6   | 9     | <i>P. tuberculosa</i> | COI long               | Mit    |
| Reimer et al., 2010c           | 3b   | 7   | 19    | <i>P. tuberculosa</i> | COI medium             | Mit    |
| Reimer et al., 2010c           | 3c   | 8   | 21    | <i>P. tuberculosa</i> | COI short              | Mit    |
| Reimer et al., 2010c           | 3d   | 9   | 16    | <i>Palythoa</i>       | 16S                    | Mit    |
| Reimer et al., 2010c           | 3e   | 6   | 23    | <i>P. tuberculosa</i> | ITS2                   | Nuc    |
| Reimer and Sinniger, 2010b     | 4    | 41  | 68    | Epizoanthidae         | 16S                    | Mit    |
| Reimer and Sinniger, 2010b     | S1   | 13  | 59    | Epizoanthidae         | COI                    | Mit    |
| Reimer and Sinniger, 2010b     | S2   | 10  | 28    | Hydrozoanthidae       | ITS                    | Nuc    |
| Reimer and Fujii, 2010         | 5a   | 17  | 39    | Zoanthidae            | 16S                    | Mit    |
| Reimer and Fujii, 2010         | 5b   | 17  | 45    | Brachycnemina         | COI                    | Mit    |
| Reimer and Fujii, 2010         | 6    | 3   | 14    | Hydrozoanthidae       | ITS                    | Nuc    |
| Swain, 2010                    | 1    | 93  | 93    | Actiniaria            | 18S–28S, 16S, 12S, COI | M&N    |
| Aguilar and Reimer, 2010       | 2    | 8   | 16    | <i>Palythoa</i>       | ITS2                   | Nuc    |
| Aguilar and Reimer, 2010       | S2   | 7   | 9     | <i>Palythoa</i>       | ITS2                   | Nuc    |
| Fujii and Reimer, 2011         | 7    | 10  | 35    | Actiniaria            | COI                    | Mit    |



| Reference                | Fig. | Sp. | Term. | Outgroup                 | Genes             | Genome |
|--------------------------|------|-----|-------|--------------------------|-------------------|--------|
| Fujii and Reimer, 2011   | 8    | 3   | 17    | <i>Parazoanthus</i>      | ITS               | Nuc    |
| Fujii and Reimer, 2011   | S1   | 11  | 30    | Actiniaria               | 16S               | Mit    |
| Reimer et al., 2011a     | 2    | 16  | 30    | <i>Parazoanthus</i>      | 16S               | Mit    |
| Reimer et al., 2011a     | S2   | 11  | 26    | Hydrozoanthidae          | COI               | Mit    |
| Reimer et al., 2011b     | 9    | 12  | 34    | <i>H. gracilis</i>       | 16S               | Mit    |
| Reimer et al., 2011b     | S1   | 10  | 35    | <i>H. gracilis</i>       | COI               | Mit    |
| Reimer et al., 2012a     | 2a   | 32  | 46    | <i>Parazoanthus</i>      | 16S               | Mit    |
| Reimer et al., 2012a     | 2b   | 17  | 28    | Hydrozoanthidae          | COI               | Mit    |
| Reimer et al., 2012a     | 2c   | 23  | 35    | <i>Parazoanthus</i>      | COI               | Mit    |
| Reimer et al., 2012a     | 2d   | 25  | 32    | Hydrozoanthidae          | ITS               | Nuc    |
| Reimer et al., 2012b     | 2    | 11  | 39    | <i>Zoanthus</i>          | 16S               | Mit    |
| Reimer et al., 2012b     | 3    | 11  | 35    | <i>Zoanthus</i>          | COI               | Mit    |
| Reimer et al., 2012b     | 4    | 8   | 65    | <i>Palythoa</i>          | ITS               | Nuc    |
| Reimer et al., 2013a     | 1    | 15  | 135   | <i>E. illoricatus</i>    | COI               | Mit    |
| Reimer et al., 2013a     | 2    | 10  | 120   | <i>H. gracilis</i>       | 16S               | Mit    |
| Reimer et al., 2013a     | 3    | 4   | 55    | <i>P. heliodiscus</i>    | ITS               | Nuc    |
| Fujii and Reimer, 2013   | 1    | 17  | 23    | Actiniaria               | 16S               | Mit    |
| Fujii and Reimer, 2013   | 2    | 14  | 19    | Actiniaria               | COI               | Mit    |
| Sinniger et al., 2013    | 4    | 29  | 35    | Epizoanthidae            | 18S, COI, 16S     | M&N    |
| Sinniger et al., 2013    | S1   | 32  | 36    | Microzoanthidae          | 16S               | Mit    |
| Hibino et al., 2014      | 2a   | 4   | 93    | <i>Palythoa</i>          | COI               | Mit    |
| Hibino et al., 2014      | 2b   | 5   | 118   | <i>Palythoa</i>          | 16S               | Mit    |
| Hibino et al., 2014      | 3    | 3   | 64    | <i>Palythoa</i>          | ITS               | Mit    |
| Reimer et al., 2013b     | 1    | 5   | 9     | <i>Zoanthus</i>          | 16S               | Mit    |
| Reimer et al., 2014      | 2    | 30  | 44    | unrooted                 | 16S & COI         | Mit    |
| Reimer et al., 2014      | 3a   | 12  | 21    | <i>Palythoa</i>          | ITS               | Nuc    |
| Reimer et al., 2014      | 3b   | 5   | 17    | <i>U. parasiticus</i>    | ITS               | Nuc    |
| Koupaei et al., 2014     | 3    | 9   | 37    | <i>Parazoanthus</i>      | 16S               | Mit    |
| Montenegro et al., 2015  | 7    | 16  | 88    | <i>Antipathozoanthus</i> | ITS               | Nuc    |
| Montenegro et al., 2015  | 8    | 14  | 92    | <i>Antipathozoanthus</i> | COI               | Mit    |
| Montenegro et al., 2015  | 9    | 13  | 82    | <i>Antipathozoanthus</i> | 16S               | Mit    |
| Montenegro et al., 2015  | 10   | 5   | 61    | <i>Parazoanthus</i>      | ALG11             | Nuc    |
| Montenegro et al., 2015  | 11   | 16  | 22    | <i>Antipathozoanthus</i> | ITS               | Nuc    |
| Montenegro et al., 2016  | 2    | 48  | 48    | Epizoanthidae            | 18S–28S, 16S, COI | M&N    |
| Montenegro et al., 2016  | SD1  | 25  | 25    | Epizoanthidae            | 18S               | Nuc    |
| Montenegro et al., 2016  | SD1  | 31  | 53    | Epizoanthidae            | ITS               | Nuc    |
| Montenegro et al., 2016  | SD1  | 18  | 18    | Epizoanthidae            | 28S               | Nuc    |
| Montenegro et al., 2016  | SD1  | 45  | 67    | Epizoanthidae            | 16S               | Mit    |
| Montenegro et al., 2016  | SD1  | 23  | 34    | Epizoanthidae            | COI               | Mit    |
| Risi and Macdonald, 2015 | 5    | 8   | 10    | <i>Hydrozoanthus</i>     | COI               | Mit    |
| Risi and Macdonald, 2015 | 6    | 8   | 10    | <i>Hydrozoanthus</i>     | 16S               | Mit    |
| Risi and Macdonald, 2015 | 7    | 8   | 15    | <i>Hydrozoanthus</i>     | ITS               | Nuc    |
| Irei et al., 2015        | 7    | 13  | 34    | <i>Palythoa</i>          | ITS               | Nuc    |
| Irei et al., 2015        | 8    | 17  | 61    | Zoanthidae               | 16S               | Mit    |
| Irei et al., 2015        | 9    | 17  | 59    | Zoanthidae               | COI               | Mit    |
| Santos et al., 2015      | 2    | 17  | 36    | Epizoanthidae            | 16S, COI          | Mit    |
| Koupaei et al., 2016     | 3    | 13  | 80    | <i>Hydrozoanthus</i>     | 16S               | Mit    |
| Koupaei et al., 2016     | 4    | 16  | 44    | <i>Hydrozoanthus</i>     | COI               | Mit    |
| Kise and Reimer, 2016    | 5    | 9   | 48    | <i>Hydrozoanthus</i>     | ITS               | Nuc    |
| Kise and Reimer, 2016    | 6    | 16  | 60    | <i>Hydrozoanthus</i>     | 16S               | Mit    |
| Kise and Reimer, 2016    | 7    | 11  | 62    | <i>Hydrozoanthus</i>     | COI               | Mit    |
| Risi and Macdonald, 2016 | 4    | 14  | 142   | <i>Hydrozoanthus</i>     | 16S               | Mit    |
| Risi and Macdonald, 2016 | 5    | 10  | 52    | <i>Hydrozoanthus</i>     | ITS               | Nuc    |

Table 2

| partition | concatenated alignment positions                                | base frequencies |        |        |        | substitution rates (G-T = 1) |        |        |          |         | gamma shape |
|-----------|-----------------------------------------------------------------|------------------|--------|--------|--------|------------------------------|--------|--------|----------|---------|-------------|
|           |                                                                 | A                | C      | G      | T      | A-C                          | A-G    | A-T    | C-G      | C-T     |             |
| 18S       | 1-1798                                                          | 0.2665           | 0.2027 | 0.2592 | 0.2714 | 0.8489                       | 1.3323 | 0.4201 | 1.0333   | 48.6716 | 0.0919      |
| ITS1      | 1799-6594                                                       | 0.2441           | 0.2490 | 0.2516 | 0.2552 | 1.1178                       | 1.6339 | 0.9692 | 1.2628   | 1.8670  | 1.0728      |
| 5.8S      | 6595-6751                                                       | 0.2346           | 0.2116 | 0.2794 | 0.2742 | 1.1664                       | 2.6667 | 0.5464 | 1.4403   | 3.2678  | 0.1733      |
| ITS2      | 6752-9515                                                       | 0.2313           | 0.2616 | 0.2670 | 0.2399 | 1.1315                       | 2.2442 | 1.4078 | 1.3658   | 2.4699  | 0.7796      |
| 28S       | 9516-13231                                                      | 0.2473           | 0.2388 | 0.2804 | 0.2333 | 0.5129                       | 1.2414 | 0.4359 | 0.5037   | 9.7887  | 0.1520      |
| 16S       | 13848-13941, 14127-14459, 15294-15421, 15863-16060              | 0.3036           | 0.1996 | 0.2635 | 0.2331 | 0.8519                       | 3.1614 | 1.8538 | 0.6183   | 5.9487  | 0.1885      |
| 16S-HV    | 13232-13847, 13942-14126, 14460-15293, 15422-15862              | 0.2300           | 0.2758 | 0.2732 | 0.2208 | 0.9120                       | 2.2374 | 1.6214 | 0.5731   | 3.0695  | 0.4515      |
| 12S       | 16061-16243, 16307-16387, 16567-16792, 16857-16922, 16957-17188 | 0.3080           | 0.1931 | 0.2631 | 0.2356 | 1.2070                       | 3.3024 | 1.7436 | 0.2116   | 4.3271  | 0.1470      |
| 12S-HV    | 16244-16306, 16388-16566, 16793-16856, 16923-16956, 17189-17311 | 0.1973           | 0.3163 | 0.3065 | 0.1797 | 1.0257                       | 1.9514 | 4.7599 | 0.3503   | 3.8633  | 0.4427      |
| COI-1     | 17312-18075\3                                                   | 0.1933           | 0.2327 | 0.3088 | 0.2650 | 2.3507                       | 7.6712 | 4.3862 | 0.2389   | 9.2735  | 0.9192      |
| COI-2     | 17313-18075\3                                                   | 0.2644           | 0.1864 | 0.3102 | 0.2388 | 1.1284                       | 2.0395 | 0.6799 | 0.2599   | 29.7862 | 0.1132      |
| COI-3     | 17314-18075\3                                                   | 0.1367           | 0.2533 | 0.1637 | 0.4462 | 0.0001                       | 0.0001 | 0.4517 | 783.7444 | 9.6590  | 0.0689      |

Fig. 1

a.

GTTTCAGAA-----TATTAGT  
GTTTCAGAA-----TATTAGT  
GTTTCAGGAG----TATTAGT  
GTTTCAGGAC----TATTAGT  
GTATCAGAGAT-CCTATTAGT  
GTATCAGAGATGCCTATTAGT  
GTATCAGAGATGCGTATTAGT

b.

GTTTCAGAA????????TATTAGT  
GTTTCAGAA????????TATTAGT  
GTTTCAG??GAG??????TATTAGT  
GTTTCAG??GAC??????TATTAGT  
GTATCAG?????AGAT-CCTATTAGT  
GTATCAG?????AGATGCCTATTAGT  
GTATCAG?????AGATGCGTATTAGT



Fig. 2

0.01

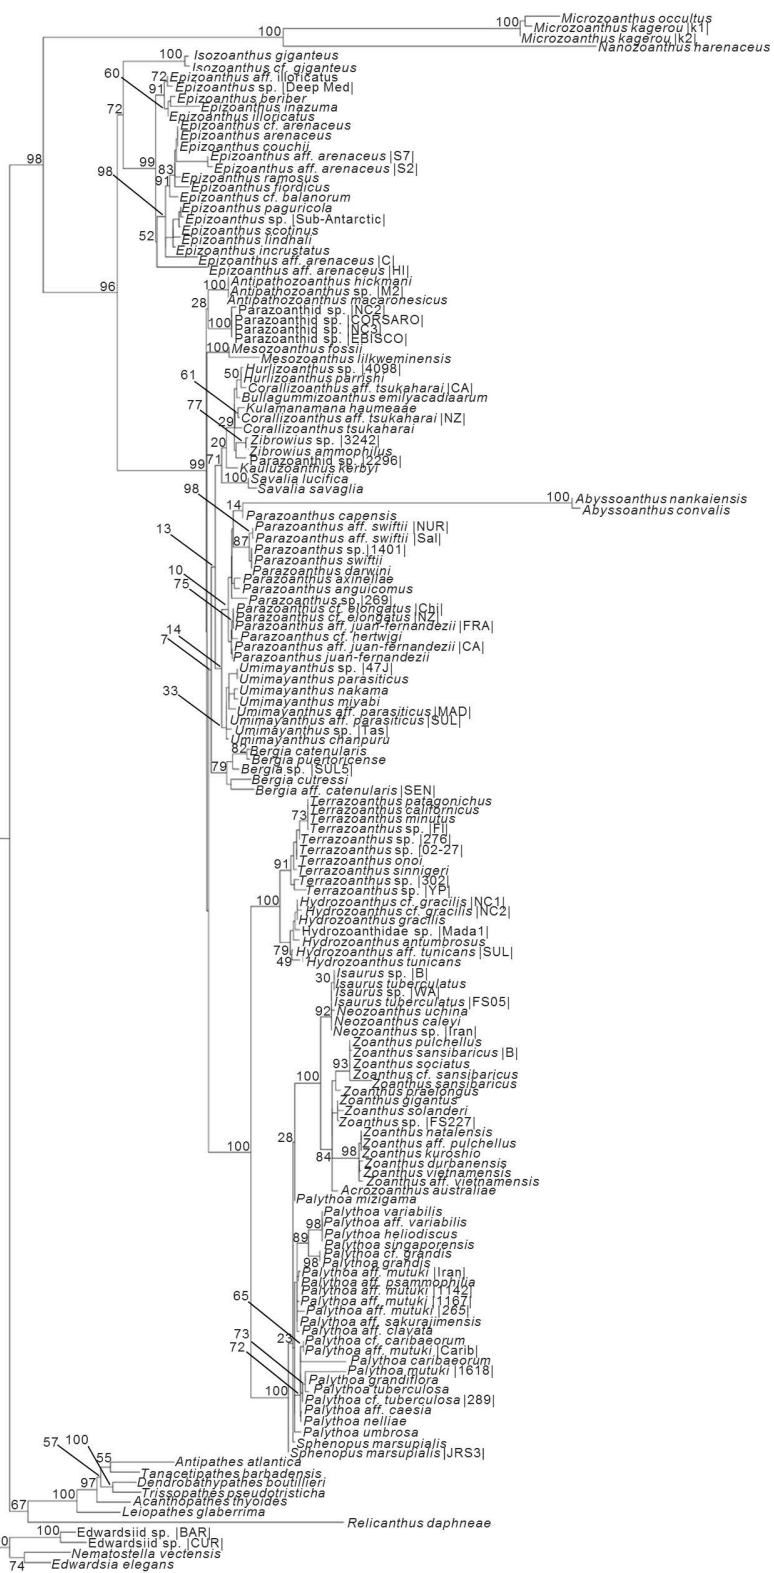

Epizoanthidae

Parazoanthidae

Parazoanthidae

Hydrozoanthidae

Zoanthidae

Brachycnemina

Sphenopidae

Macrozoantharia

Zoanthidea

Brachycnemina

An

Ac
